# Supplementary material for: High-Throughput Screening of the Repurposing Hub Library to Identify Drugs with Novel Inhibitory Activity against Candida albicans and Candida auris Biofilms
Source: MDPI journal article supplement (doi:10.3390/jof9090879), 2023-08-27
Supplement: s1 [file s1]

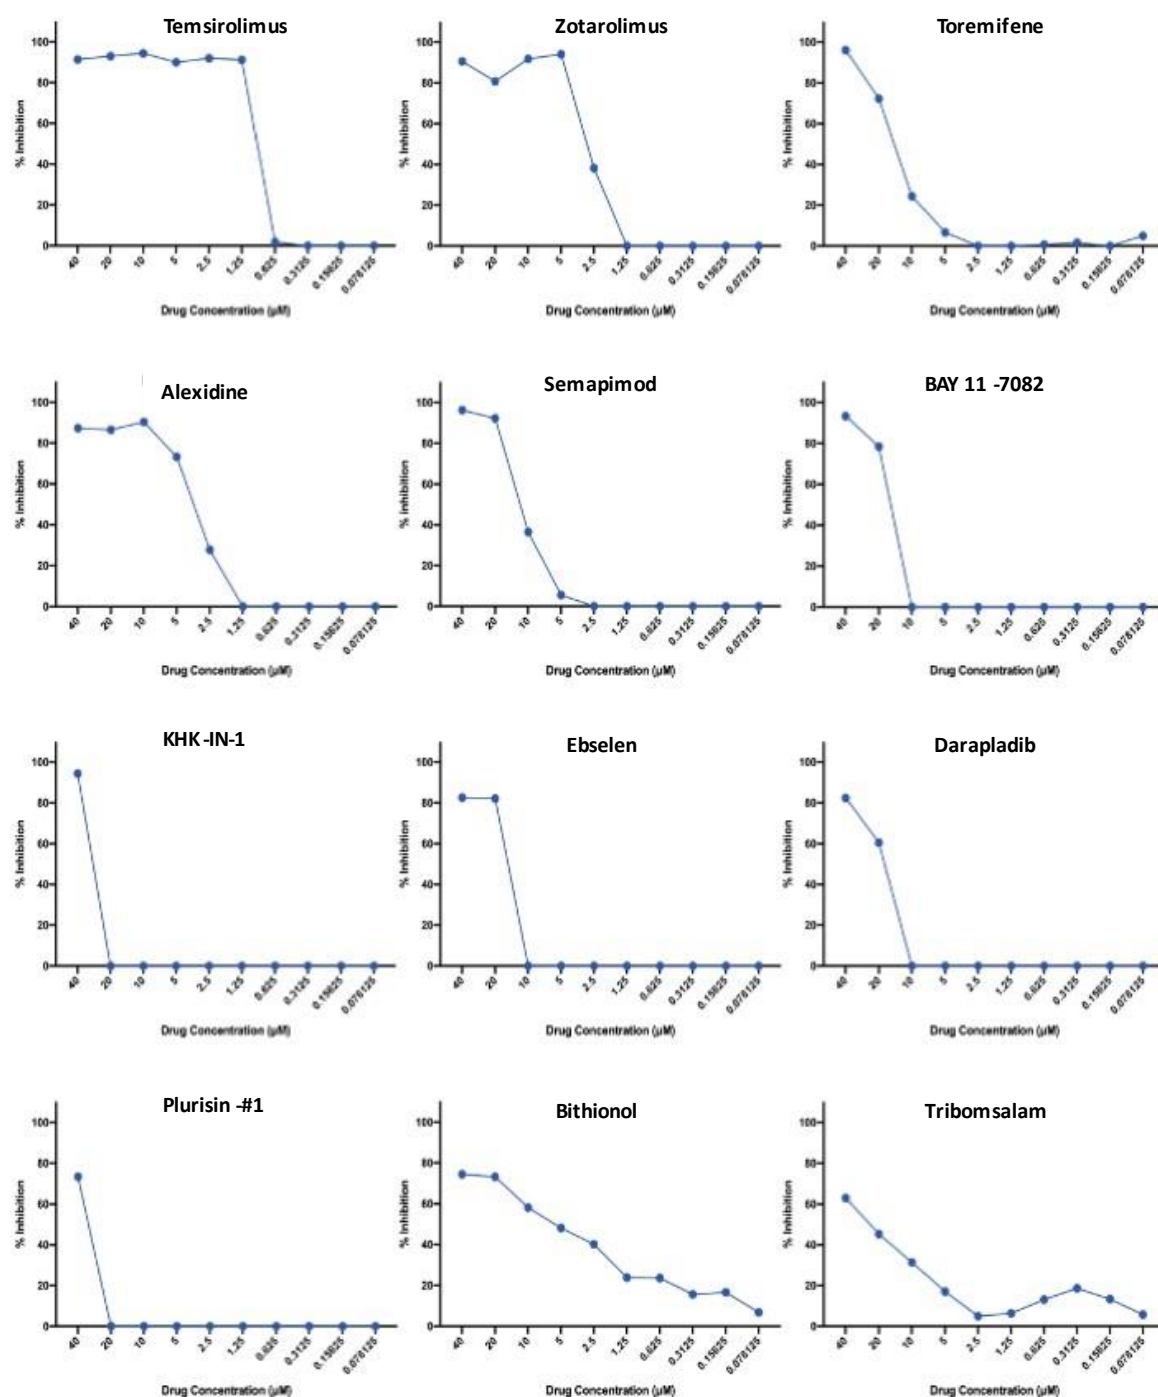

**Figure S1:** Representative examples of results from concentration-dependent confirmatory measurement. Graphs show the 10-point concentration curves for repositionable hits from the primary screening showing dose-responsive *C. auris* biofilm inhibition, by plotting the percent biofilm inhibition achieved at each concentration tested. From these results, their IC<sub>50</sub> was calculated as reported in Materials and Methods.

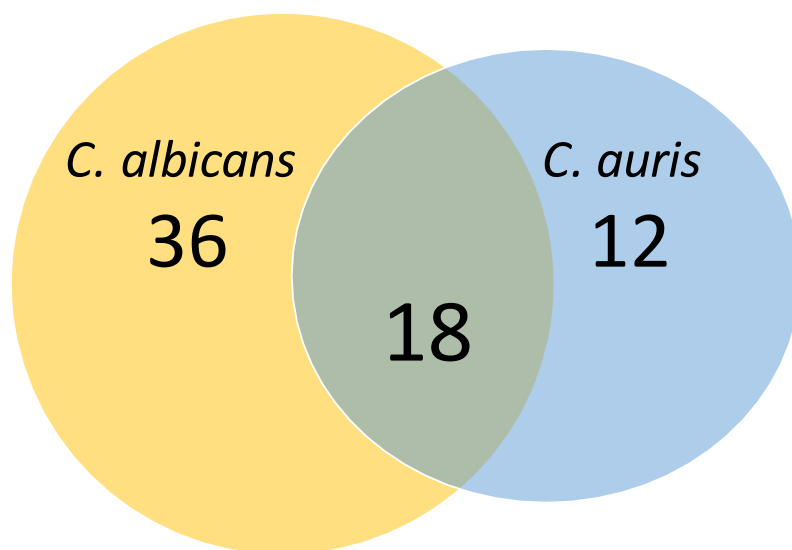

**Figure S2:** Venn diagram depicting numbers of confirmed inhibitory compounds against either or both *C. albicans* and *C. auris* biofilm formation.

COC1=CC=C(C=C1)OC2C(OC3C(C(C(C3O)OC4C(C(C(C(C4O)OC5C(C(C(C(C5O)OC6C(C(C(C(C6O)OC7C(C(C(C(C7O)OC8C(C(C(C(C8O)OC9C(C(C(C(C9O)OC10C(C(C(C(C10O)OC11C(C(C(C(C11O)OC12C(C(C(C(C12O)OC13C(C(C(C(C13O)OC14C(C(C(C(C14O)OC15C(C(C(C(C15O)OC16C(C(C(C(C16O)OC17C(C(C(C(C17O)OC18C(C(C(C(C18O)OC19C(C(C(C(C19O)OC20C(C(C(C(C20O)OC21C(C(C(C(C21O)OC22C(C(C(C(C22O)OC23C(C(C(C(C23O)OC24C(C(C(C(C24O)OC25C(C(C(C(C25O)OC26C(C(C(C(C26O)OC27C(C(C(C(C27O)OC28C(C(C(C(C28O)OC29C(C(C(C(C29O)OC30C(C(C(C(C30O)OC31C(C(C(C(C31O)OC32C(C(C(C(C32O)OC33C(C(C(C(C33O)OC34C(C(C(C(C34O)OC35C(C(C(C(C35O)OC36C(C(C(C(C36O)OC37C(C(C(C(C37O)OC38C(C(C(C(C38O)OC39C(C(C(C(C39O)OC40C(C(C(C(C40O)OC41C(C(C(C(C41O)OC42C(C(C(C(C42O)OC43C(C(C(C(C43O)OC44C(C(C(C(C44O)OC45C(C(C(C(C45O)OC46C(C(C(C(C46O)OC47C(C(C(C(C47O)OC48C(C(C(C(C48O)OC49C(C(C(C(C49O)OC50C(C(C(C(C50O)OC51C(C(C(C(C51O)OC52C(C(C(C(C52O)OC53C(C(C(C(C53O)OC54C(C(C(C(C54O)OC55C(C(C(C(C55O)OC56C(C(C(C(C56O)OC57C(C(C(C(C57O)OC58C(C(C(C(C58O)OC59C(C(C(C(C59O)OC60C(C(C(C(C60O)OC61C(C(C(C(C61O)OC62C(C(C(C(C62O)OC63C(C(C(C(C63O)OC64C(C(C(C(C64O)OC65C(C(C(C(C65O)OC66C(C(C(C(C66O)OC67C(C(C(C(C67O)OC68C(C(C(C(C68O)OC69C(C(C(C(C69O)OC70C(C(C(C(C70O)OC71C(C(C(C(C71O)OC72C(C(C(C(C72O)OC73C(C(C(C(C73O)OC74C(C(C(C(C74O)OC75C(C(C(C(C75O)OC76C(C(C(C(C76O)OC77C(C(C(C(C77O)OC78C(C(C(C(C78O)OC79C(C(C(C(C79O)OC80C(C(C(C(C80O)OC81C(C(C(C(C81O)OC82C(C(C(C(C82O)OC83C(C(C(C(C83O)OC84C(C(C(C(C84O)OC85C(C(C(C(C85O)OC86C(C(C(C(C86O)OC87C(C(C(C(C87O)OC88C(C(C(C(C88O)OC89C(C(C(C(C89O)OC90C(C(C(C(C90O)OC91C(C(C(C(C91O)OC92C(C(C(C(C92O)OC93C(C(C(C(C93O)OC94C(C(C(C(C94O)OC95C(C(C(C(C95O)OC96C(C(C(C(C96O)OC97C(C(C(C(C97O)OC98C(C(C(C(C98O)OC99C(C(C(C(C99O)OC100C(C(C(C(C100O)OC101C(C(C(C(C101O)OC102C(C(C(C(C102O)OC103C(C(C(C(C103O)OC104C(C(C(C(C104O)OC105C(C(C(C(C105O)OC106C(C(C(C(C106O)OC107C(C(C(C(C107O)OC108C(C(C(C(C108O)OC109C(C(C(C(C109O)OC110C(C(C(C(C110O)OC111C(C(C(C(C111O)OC112C(C(C(C(C112O)OC113C(C(C(C(C113O)OC114C(C(C(C(C114O)OC115C(C(C(C(C115O)OC116C(C(C(C(C116O)OC117C(C(C(C(C117O)OC118C(C(C(C(C118O)OC119C(C(C(C(C119O)OC120C(C(C(C(C120O)OC121C(C(C(C(C121O)OC122C(C(C(C(C122O)OC123C(C(C(C(C123O)OC124C(C(C(C(C124O)OC125C(C(C(C(C125O)OC126C(C(C(C(C126O)OC127C(C(C(C(C127O)OC128C(C(C(C(C128O)OC129C(C(C(C(C129O)OC130C(C(C(C(C130O)OC131C(C(C(C(C131O)OC132C(C(C(C(C132O)OC133C(C(C(C(C133O)OC134C(C(C(C(C134O)OC135C(C(C(C(C135O)OC136C(C(C(C(C136O)OC137C(C(C(C(C137O)OC138C(C(C(C(C138O)OC139C(C(C(C(C139O)OC140C(C(C(C(C140O)OC141C(C(C(C(C141O)OC142C(C(C(C(C142O)OC143C(C(C(C(C143O)OC144C(C(C(C(C144O)OC145C(C(C(C(C145O)OC146C(C(C(C(C146O)OC147C(C(C(C(C147O)OC148C(C(C(C(C148O)OC149C(C(C(C(C149O)OC150C(C(C(C(C150O)OC151C(C(C(C(C151O)OC152C(C(C(C(C152O)OC153C(C(C(C(C153O)OC154C(C(C(C(C154O)OC155C(C(C(C(C155O)OC156C(C(C(C(C156O)OC157C(C(C(C(C157O)OC158C(C(C(C(C158O)OC159C(C(C(C(C159O)OC160C(C(C(C(C160O)OC161C(C(C(C(C161O)OC162C(C(C(C(C162O)OC163C(C(C(C(C163O)OC164C(C(C(C(C164O)OC165C(C(C(C(C165O)OC166C(C(C(C(C166O)OC167C(C(C(C(C167O)OC168C(C(C(C(C168O)OC169C(C(C(C(C169O)OC170C(C(C(C(C170O)OC171C(C(C(C(C171O)OC172C(C(C(C(C172O)OC173C(C(C(C(C173O)OC174C(C(C(C(C174O)OC175C(C(C(C(C175O)OC176C(C(C(C(C176O)OC177C(C(C(C(C177O)OC178C(C(C(C(C178O)OC179C(C(C(C(C179O)OC180C(C(C(C(C180O)OC181C(C(C(C(C181O)OC182C(C(C(C(C182O)OC183C(C(C(C(C183O)OC184C(C(C(C(C184O)OC185C(C(C(C(C185O)OC186C(C(C(C(C186O)OC187C(C(C(C(C187O)OC188C(C(C(C(C188O)OC189C(C(C(C(C189O)OC190C(C(C(C(C190O)OC191C(C(C(C(C191O)OC192C(C(C(C(C192O)OC193C(C(C(C(C193O)OC194C(C(C(C(C194O)OC195C(C(C(C(C195O)OC196C(C(C(C(C196O)OC197C(C(C(C(C197O)OC198C(C(C(C(C198O)OC199C(C(C(C(C199O)OC200C(C(C(C(C200O)OC201C(C(C(C(C201O)OC202C(C(C(C(C202O)OC203C(C(C(C(C203O)OC204C(C(C(C(C204O)OC205C(C(C(C(C205O)OC206C(C(C(C(C206O)OC207C(C(C(C(C207O)OC208C(C(C(C(C208O)OC209C(C(C(C(C209O)OC210C(C(C(C(C210O)OC211C(C(C(C(C211O)OC212C(C(C(C(C212O)OC213C(C(C(C(C213O)OC214C(C(C(C(C214O)OC215C(C(C(C(C215O)OC216C(C(C(C(C216O)OC217C(C(C(C(C217O)OC218C(C(C(C(C218O)OC219C(C(C(C(C219O)OC220C(C(C(C(C220O)OC221C(C(C(C(C221O)OC222C(C(C(C(C222O)OC223C(C(C(C(C223O)OC224C(C(C(C(C224O)OC225C(C(C(C(C225O)OC226C(C(C(C(C226O)OC227C(C(C(C(C227O)OC228C(C(C(C(C228O)OC229C(C(C(C(C229O)OC230C(C(C(C(C230O)OC231C(C(C(C(C231O)OC232C(C(C(C(C232O)OC233C(C(C(C(C233O)OC234C(C(C(C(C234O)OC235C(C(C(C(C235O)OC236C(C(C(C(C236O)OC237C(C(C(C(C237O)OC238C(C(C(C(C238O)OC239C(C(C(C(C239O)OC240C(C(C(C(C240O)OC241C(C(C(C(C241O)OC242C(C(C(C(C242O)OC243C(C(C(C(C243O)OC244C(C(C(C(C244O)OC245C(C(C(C(C245O)OC246C(C(C(C(C246O)OC247C(C(C(C(C247O)OC248C(C(C(C(C248O)OC249C(C(C(C(C249O)OC250C(C(C(C(C250O)OC251C(C(C(C(C251O)OC252C(C(C(C(C252O)OC253C(C(C(C(C253O)OC254C(C(C(C(C254O)OC255C(C(C(C(C255O)OC256C(C(C(C(C256O)OC257C(C(C(C(C257O)OC258C(C(C(C(C258O)OC259C(C(C(C(C259O)OC260C(C(C(C(C260O)OC261C(C(C(C(C261O)OC262C(C(C(C(C262O)OC263C(C(C(C(C263O)OC264C(C(C(C(C264O)OC265C(C(C(C(C265O)OC266C(C(C(C(C266O)OC267C(C(C(C(C267O)OC268C(C(C(C(C268O)OC269C(C(C(C(C269O)OC270C(C(C(C(C270O)OC271C(C(C(C(C271O)OC272C(C(C(C(C272O)OC273C(C(C(C(C273O)OC274C(C(C(C(C274O)OC275C(C(C(C(C275O)OC276C(C(C(C(C276O)OC277C(C(C(C(C277O)OC278C(C(C(C(C278O)OC279C(C(C(C(C279O)OC280C(C(C(C(C280O)OC281C(C(C(C(C281O)OC282C(C(C(C(C282O)OC283C(C(C(C(C283O)OC284C(C(C(C(C284O)OC285C(C(C(C(C285O)OC286C(C(C(C(C286O)OC287C(C(C(C(C287O)OC288C(C(C(C(C288O)OC289C(C(C(C(C289O)OC290C(C(C(C(C290O)OC291C(C(C(C(C291O)OC292C(C(C(C(C292O)OC293C(C(C(C(C293O)OC294C(C(C(C(C294O)OC295C(C(C(C(C295O)OC296C(C(C(C(C296O)OC297C(C(C(C(C297O)OC298C(C(C(C(C298O)OC299C(C(C(C(C299O)OC300C(C(C(C(C300O)OC301C(C(C(C(C301O)OC302C(C(C(C(C302O)OC303C(C(C(C(C303O)OC304C(C(C(C(C304O)OC305C(C(C(C(C305O)OC306C(C(C(C(C306O)OC307C(C(C(C(C307O)OC308C(C(C(C(C308O)OC309CCc1ccc(cc1)S(=O)(=O)/C=C/C#N

**Figure S3:** Chemical structures and properties of the leading repositionable compounds ebselen (**A**), temsirolimus (**B**) and compound BAY 11-082 (**C**)
